# Supplementary material for: Arctic Ocean simulations in the CMIP6 Ocean Model Intercomparison Project (OMIP)
Source: Copernicus journal article supplement (doi:10.5194/gmd-16-2539-2023), 2023-05-10
Supplement: Supplementary file 1 [file gmd-16-2539-2023-supplement.pdf]

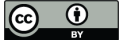

*Supplement of*

## **Arctic Ocean simulations in the CMIP6 Ocean Model Intercomparison Project (OMIP)**

**Qi Shu et al.**

*Correspondence to:* Qi Shu (shuqi@fio.org.cn)

The copyright of individual parts of the supplement might differ from the article licence.

## Supporting Information

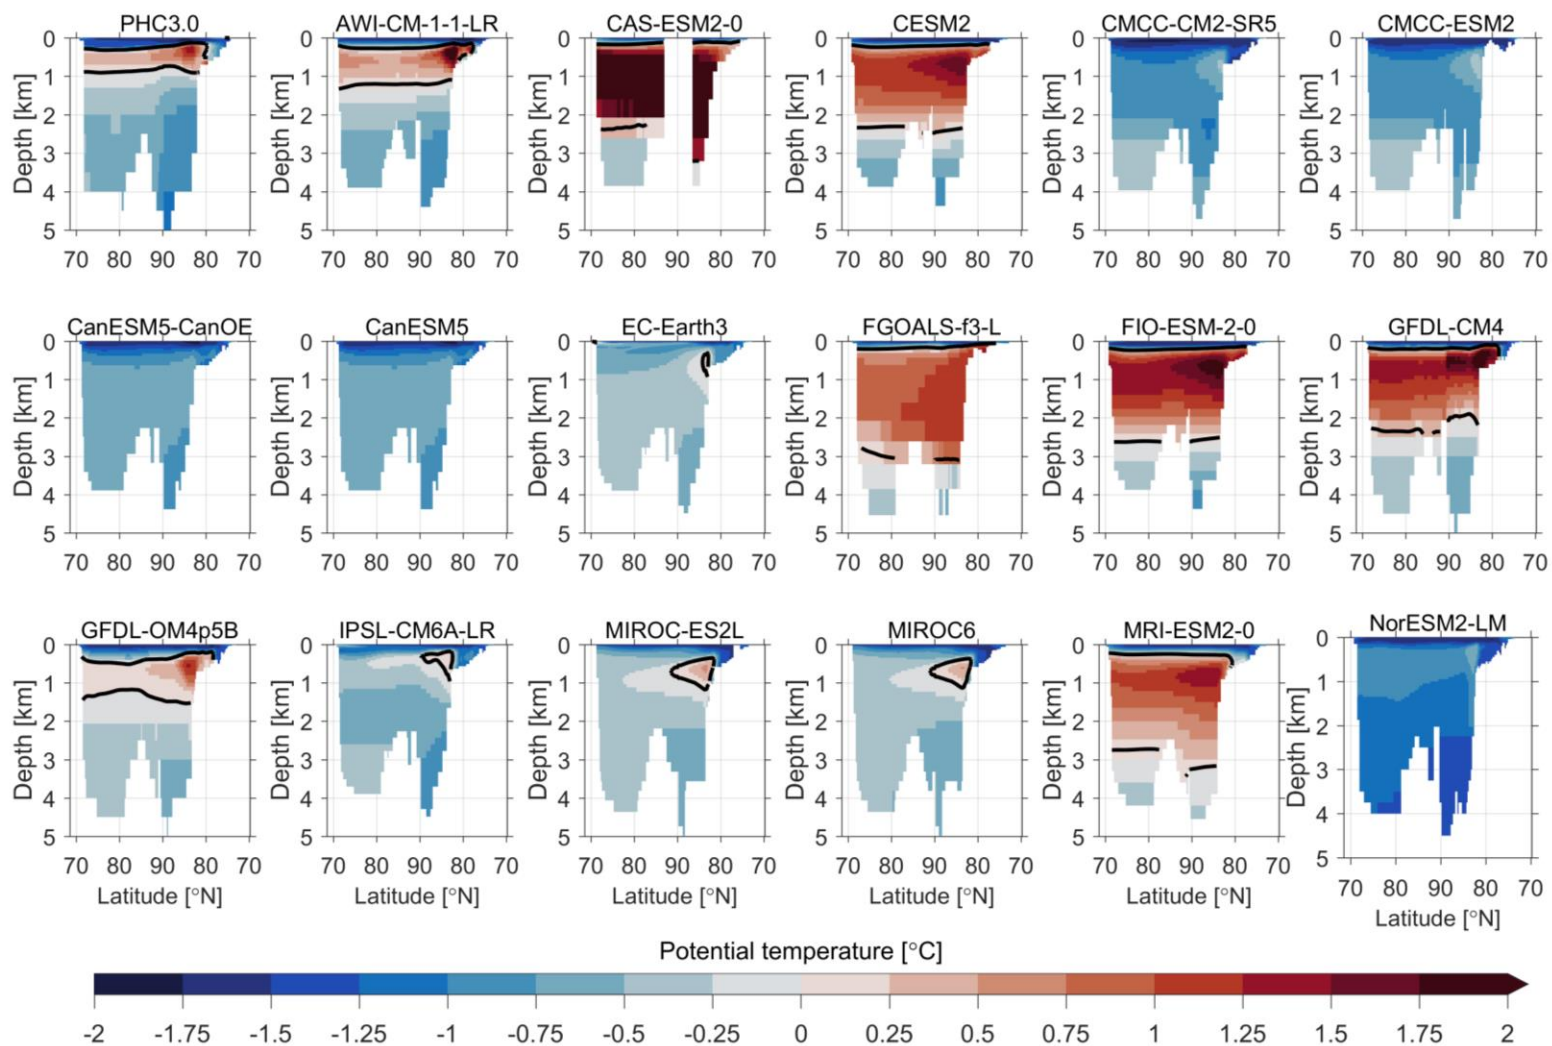

**Figure S1. Potential temperature (unit: °C) along section S (Fig. 1) from the PHC3.0 climatology and OMIP-1 models averaged from 1971 to 2000. The black line is the 0 °C isotherm.**

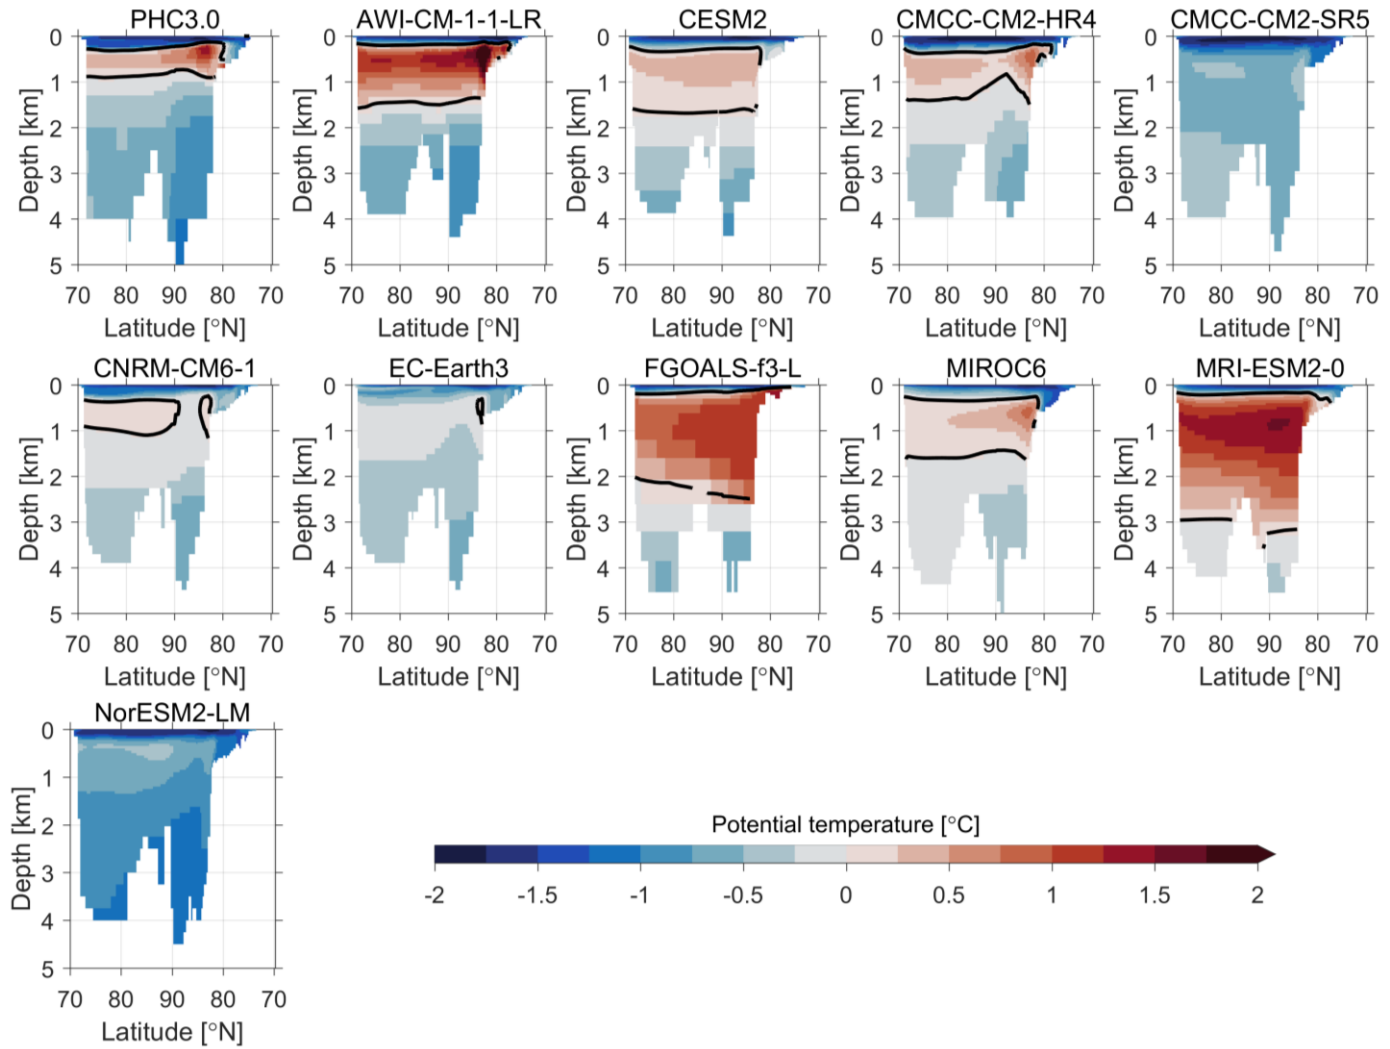

**Figure S2. Potential temperature (unit: °C) along section S (Fig. 1) from the PHC3.0 climatology and OMIP-2 models averaged from 1971 to 2000. The black line is the 0 °C isotherm.**

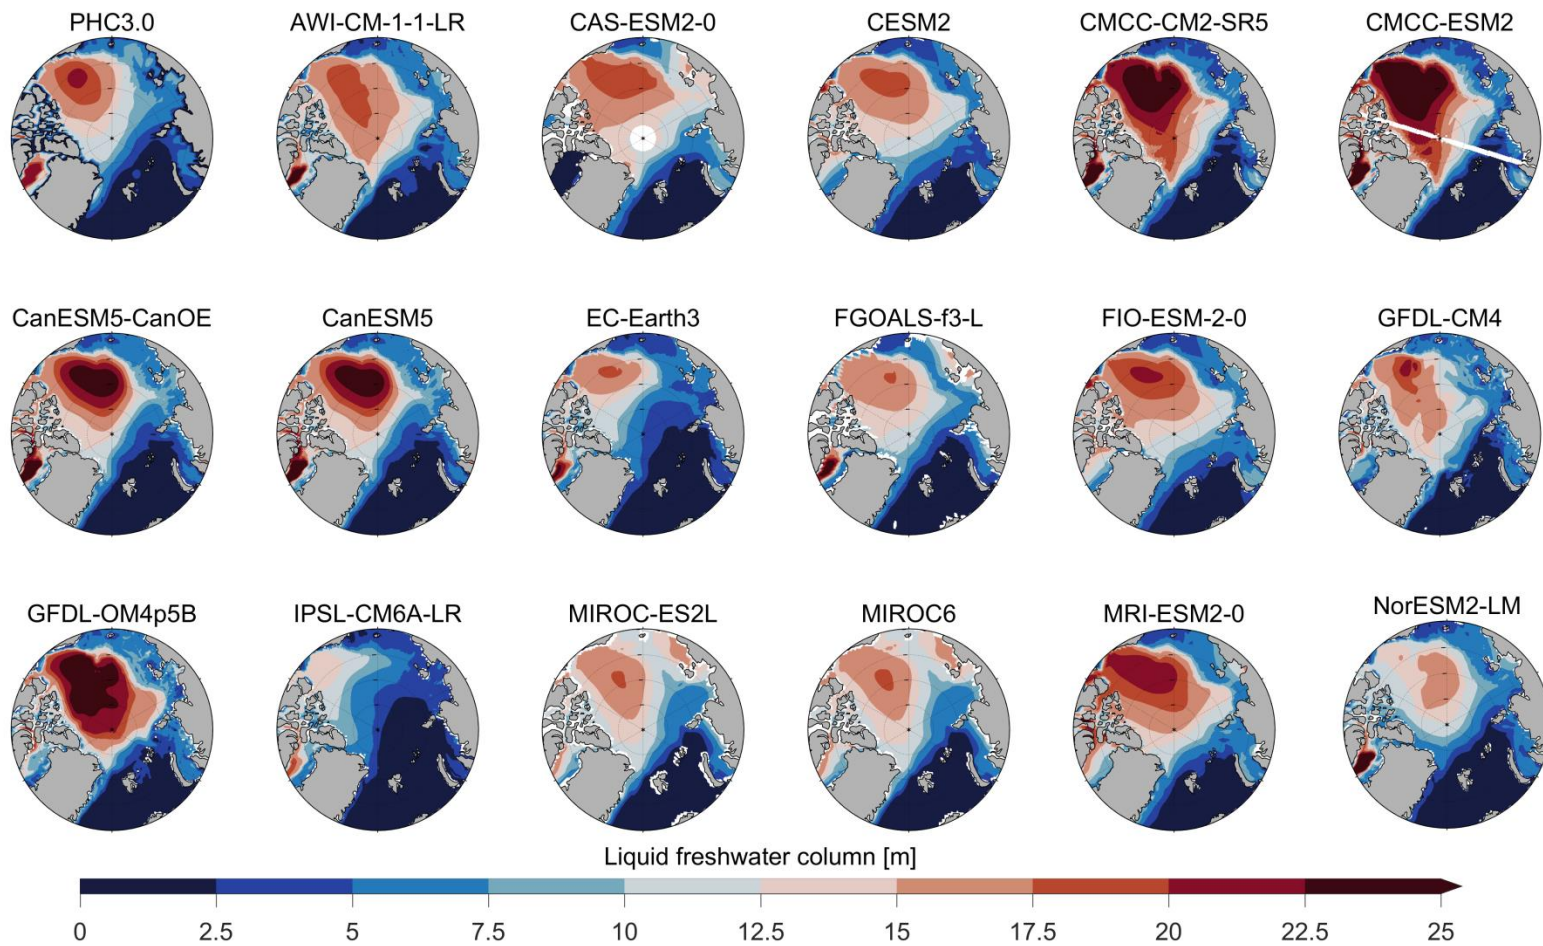

**Figure S3. Liquid freshwater column (unit: m) from PHC3.0 climatology and OMIP-1 models averaged over 1971 to 2000.**

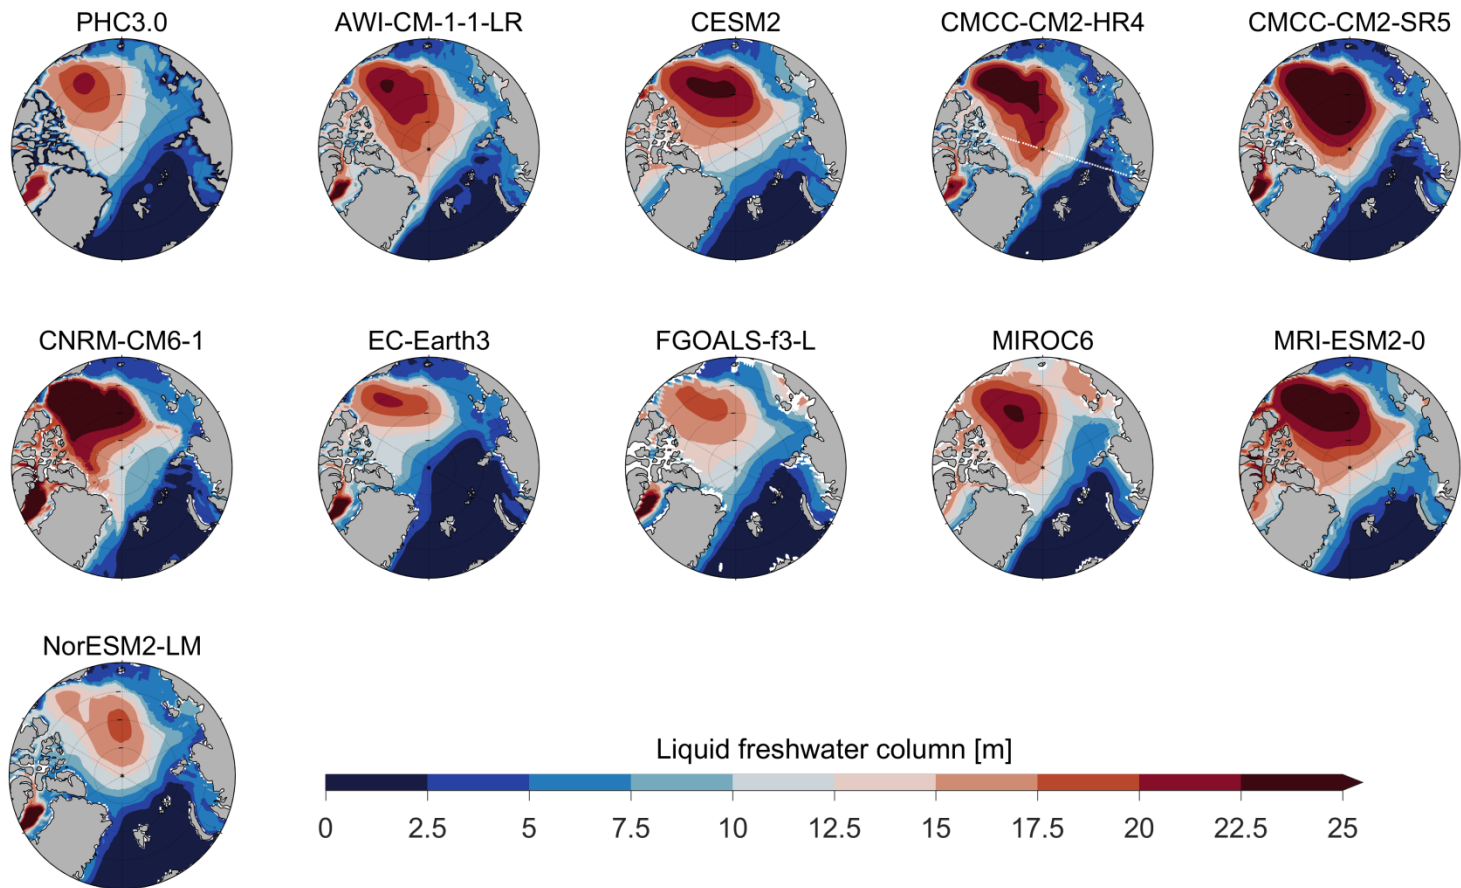

**Figure S4. Liquid freshwater column (unit: m) from PHC3.0 climatology and OMIP-2 models averaged over 1971 to 2000.**



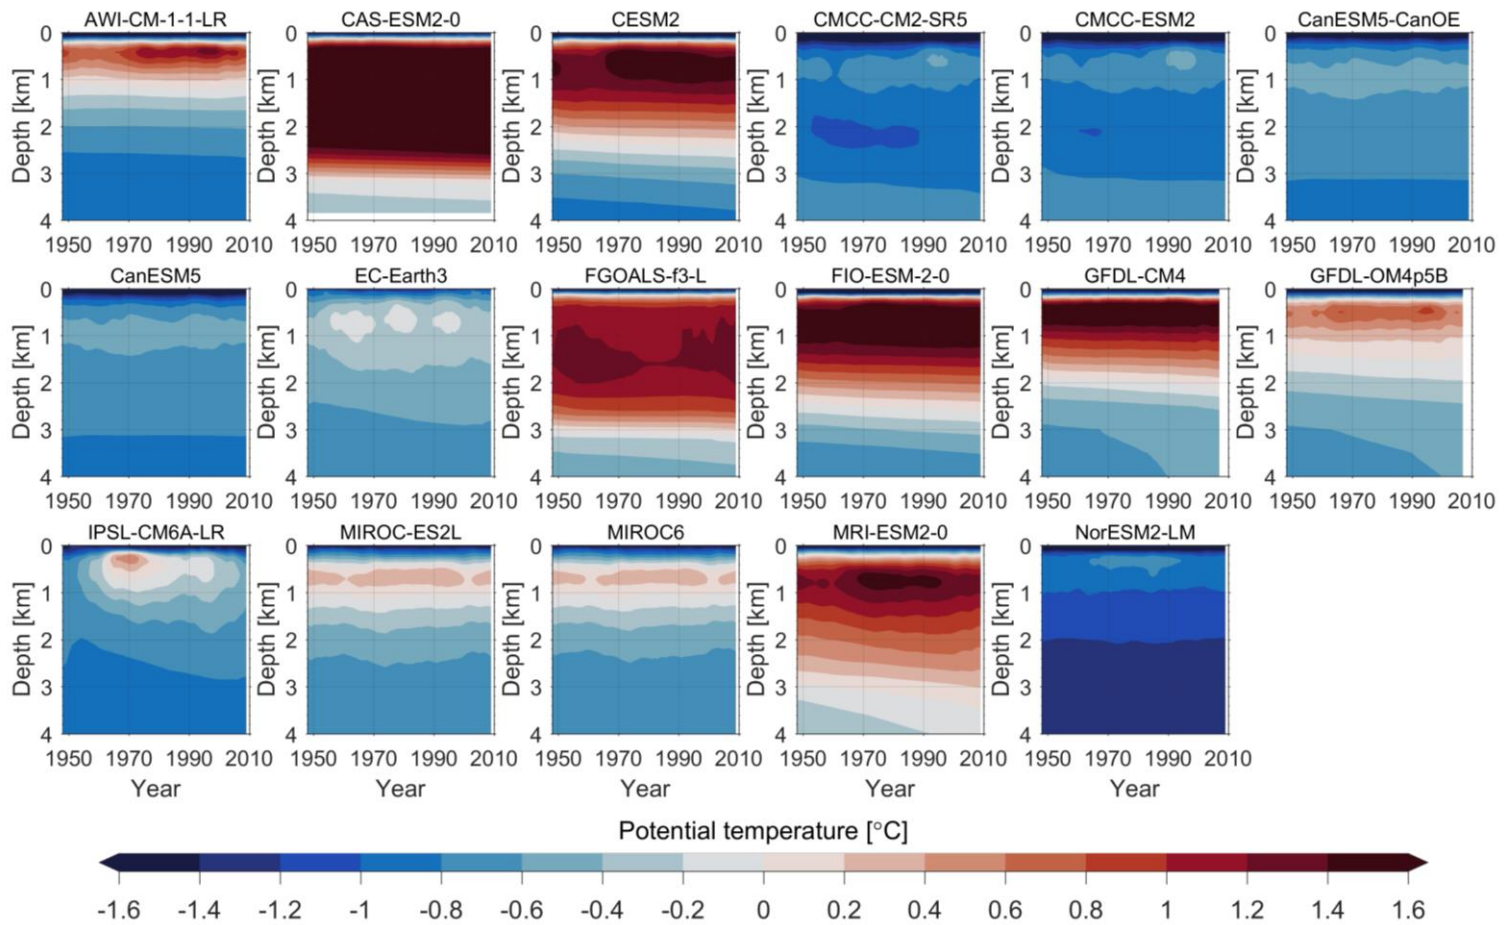

**Figure S5.** Hovmöller diagram of basin-mean potential temperature (unit: °C) for the Eurasian Basin from OMIP-1 models.

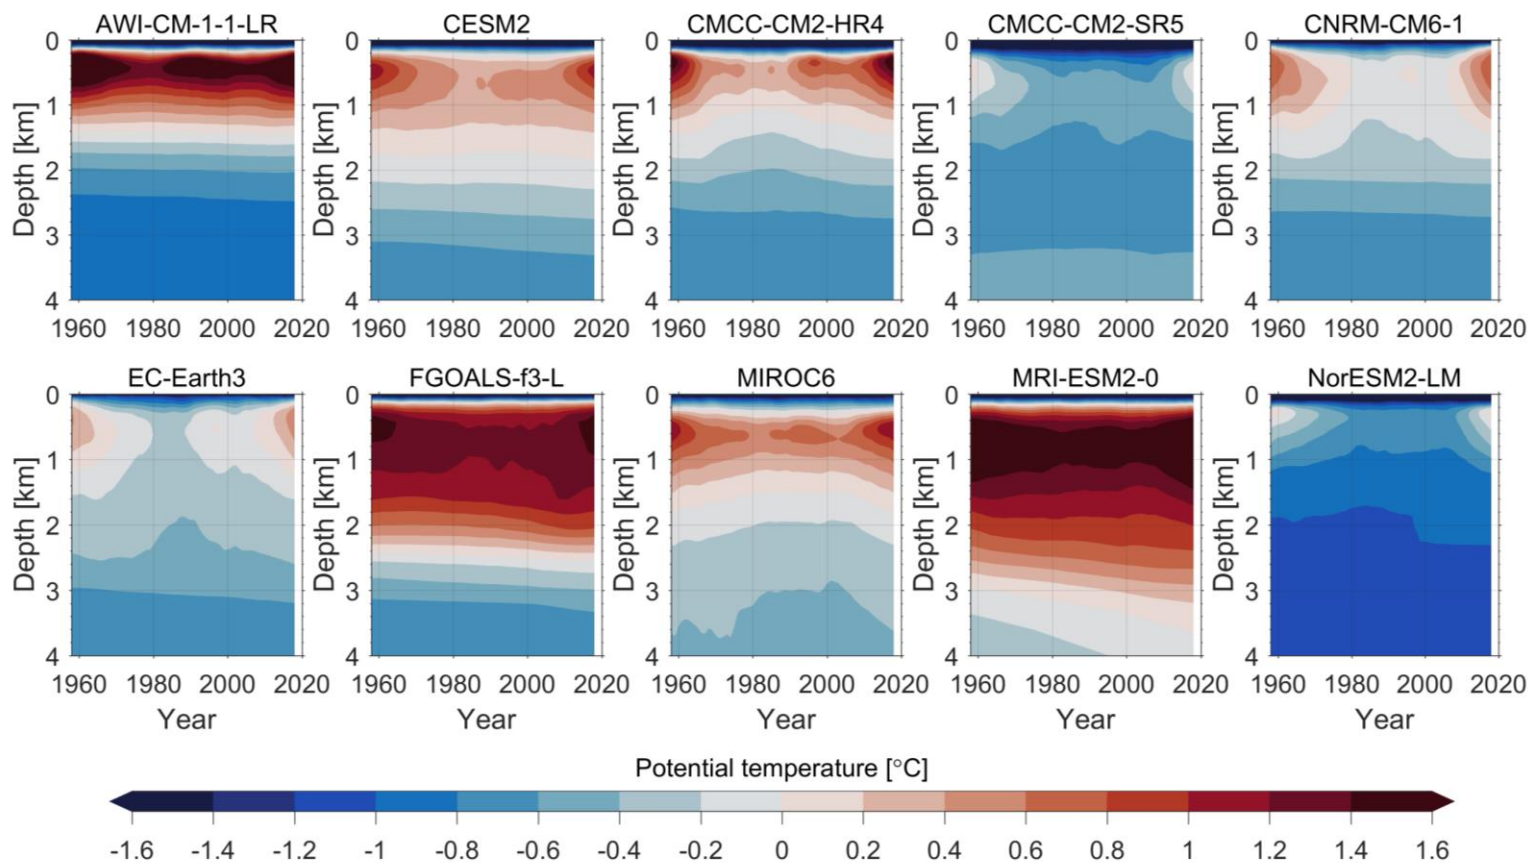

**Figure S6. Hovmöller diagram of basin-mean potential temperature (unit: °C) for the Eurasian Basin from OMIP-2 models.**

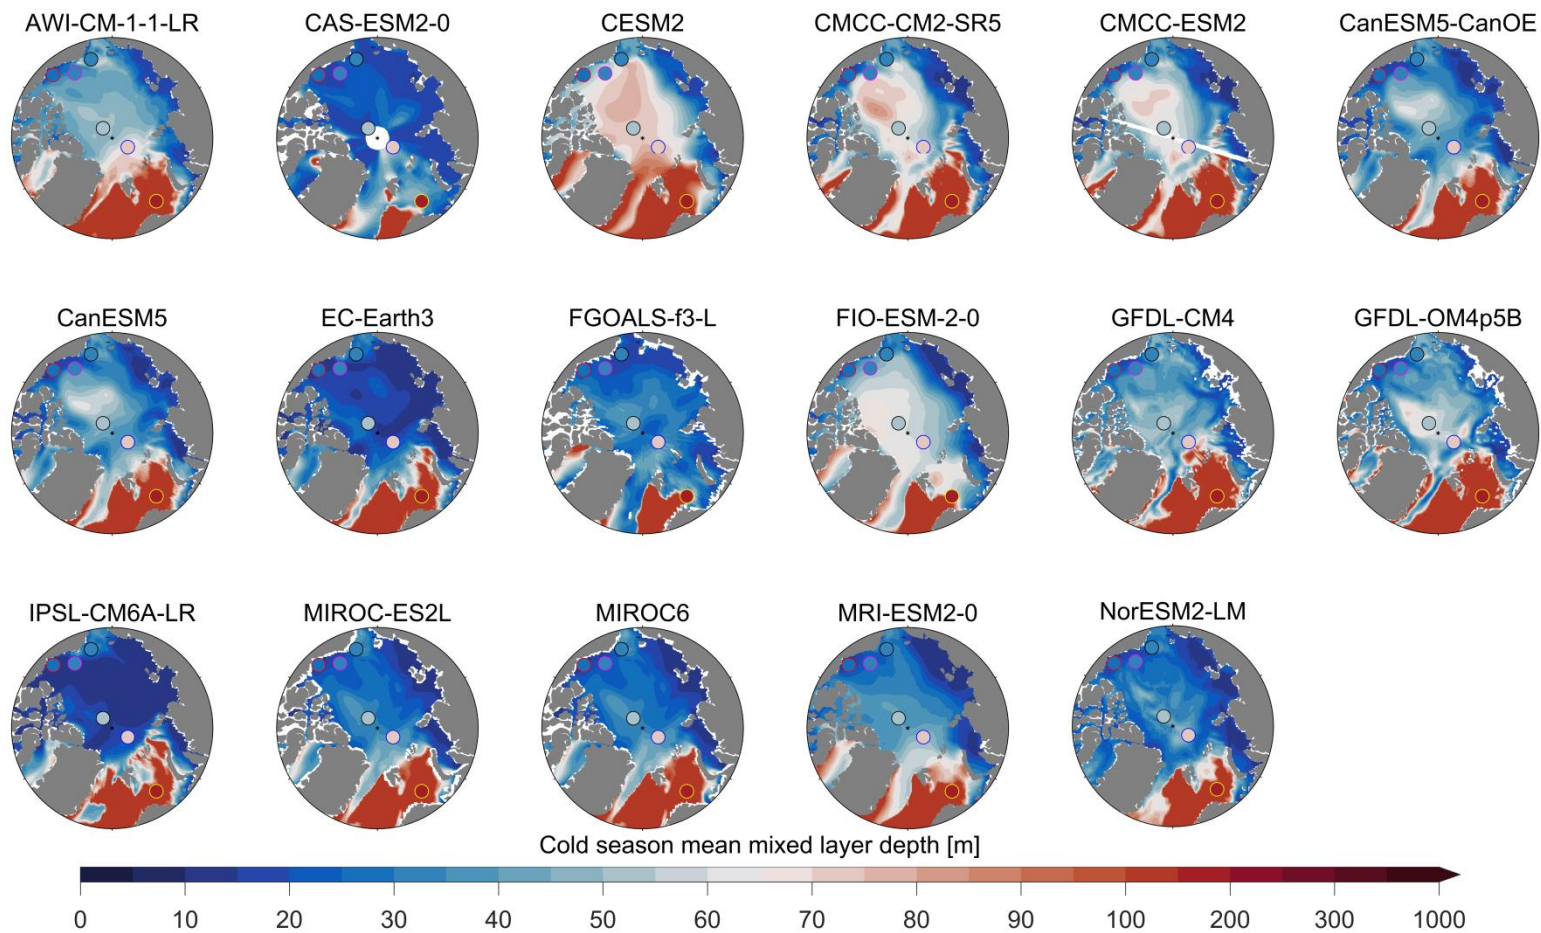

**Figure S7. Cold season (November-May) mixed layer depth (unit: m) from OMIP-1 and observations (dots). The average period for OMIP-1 is from 1979 to 2009 and the observations are based on the period of 1979 to 2012.**



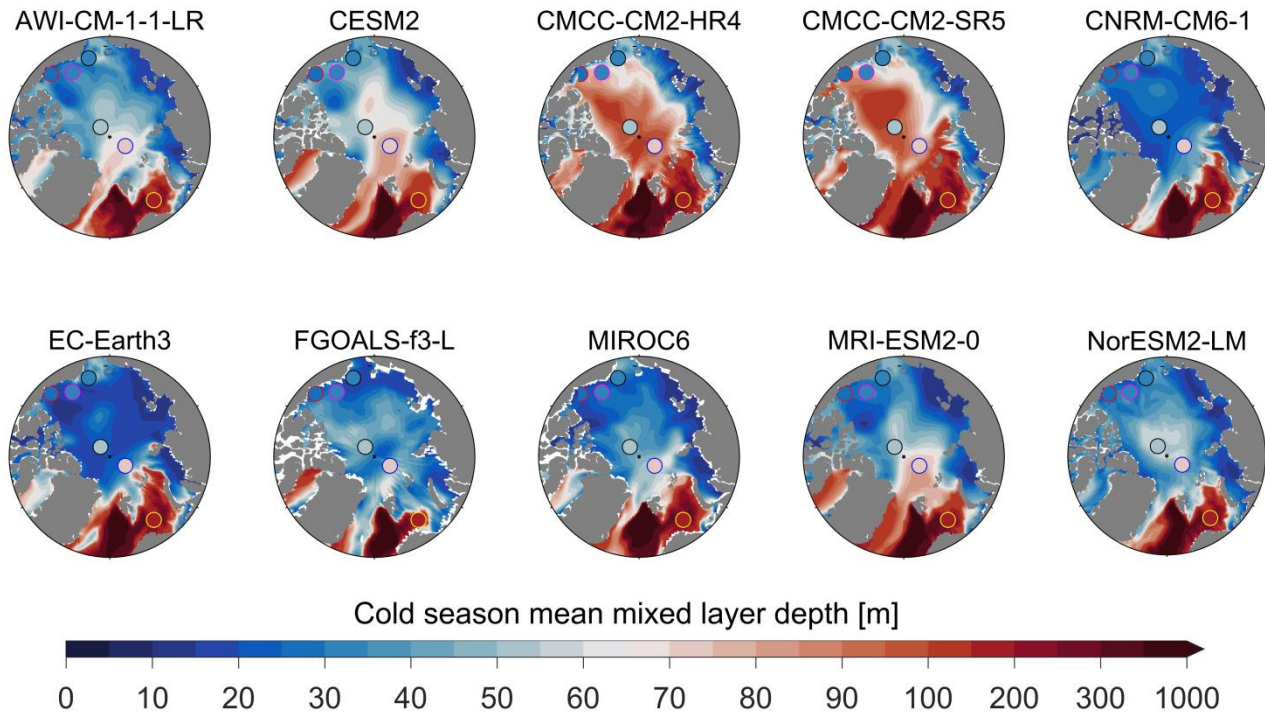

**Figure S8.** Cold season (November-May) mixed layer depth (unit: m) from OMIP-2 and observations (dots). The average period for OMIP-2 is from 1979 to 2012 and the observations are based on the period of 1979 to 2012.

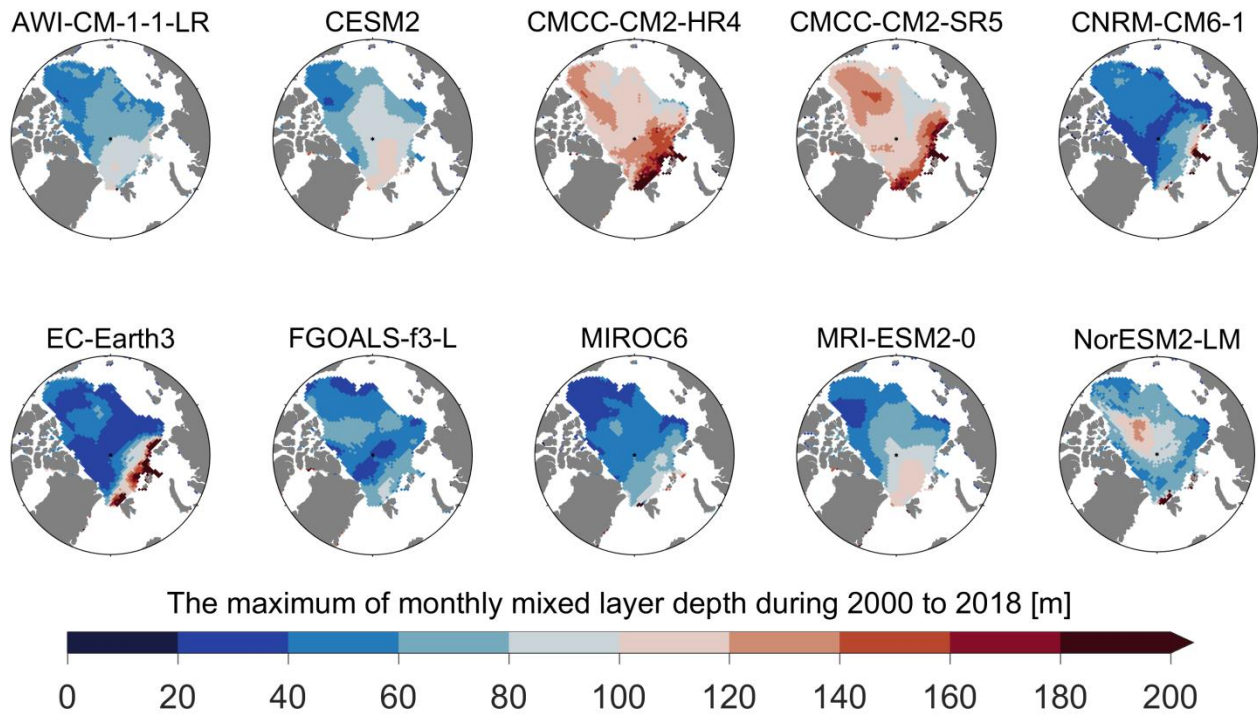

**Figure S9.** The maximum of monthly mixed layer depth during 2000 to 2018 in OMP-2 models.

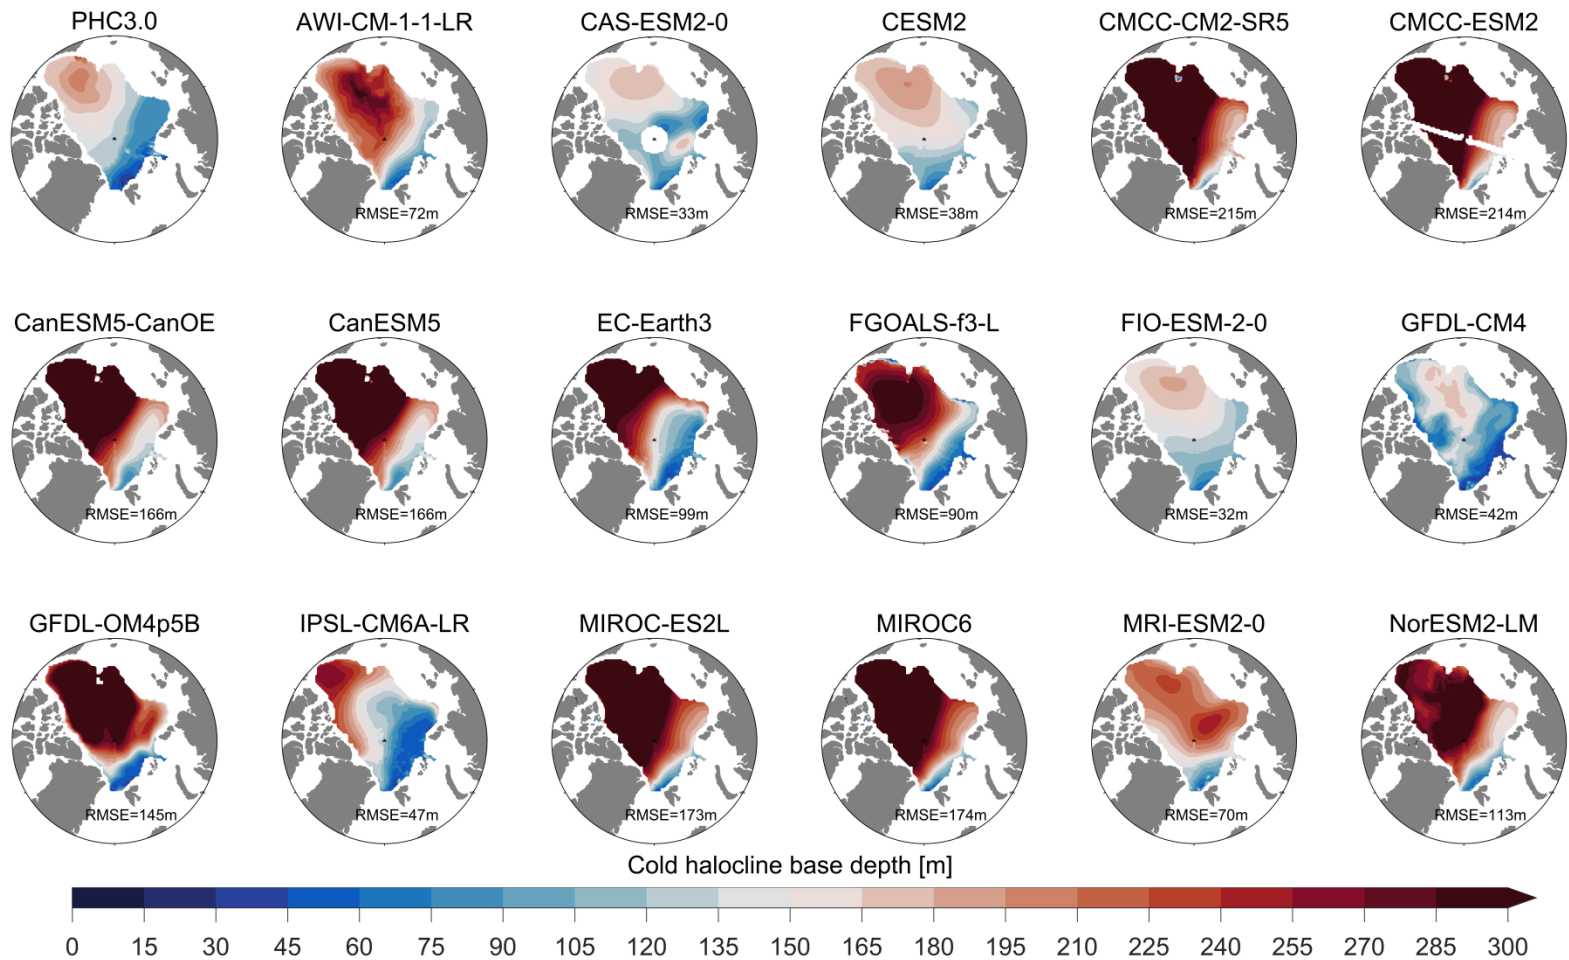

Figure S10. Cold halocline base depth (unit: m) from PHC3.0 climatology and OMIP-1 models average over 1971 to 2000. The root-mean-square error (RMSE) averaged over the Arctic Ocean is labeled in each panel.

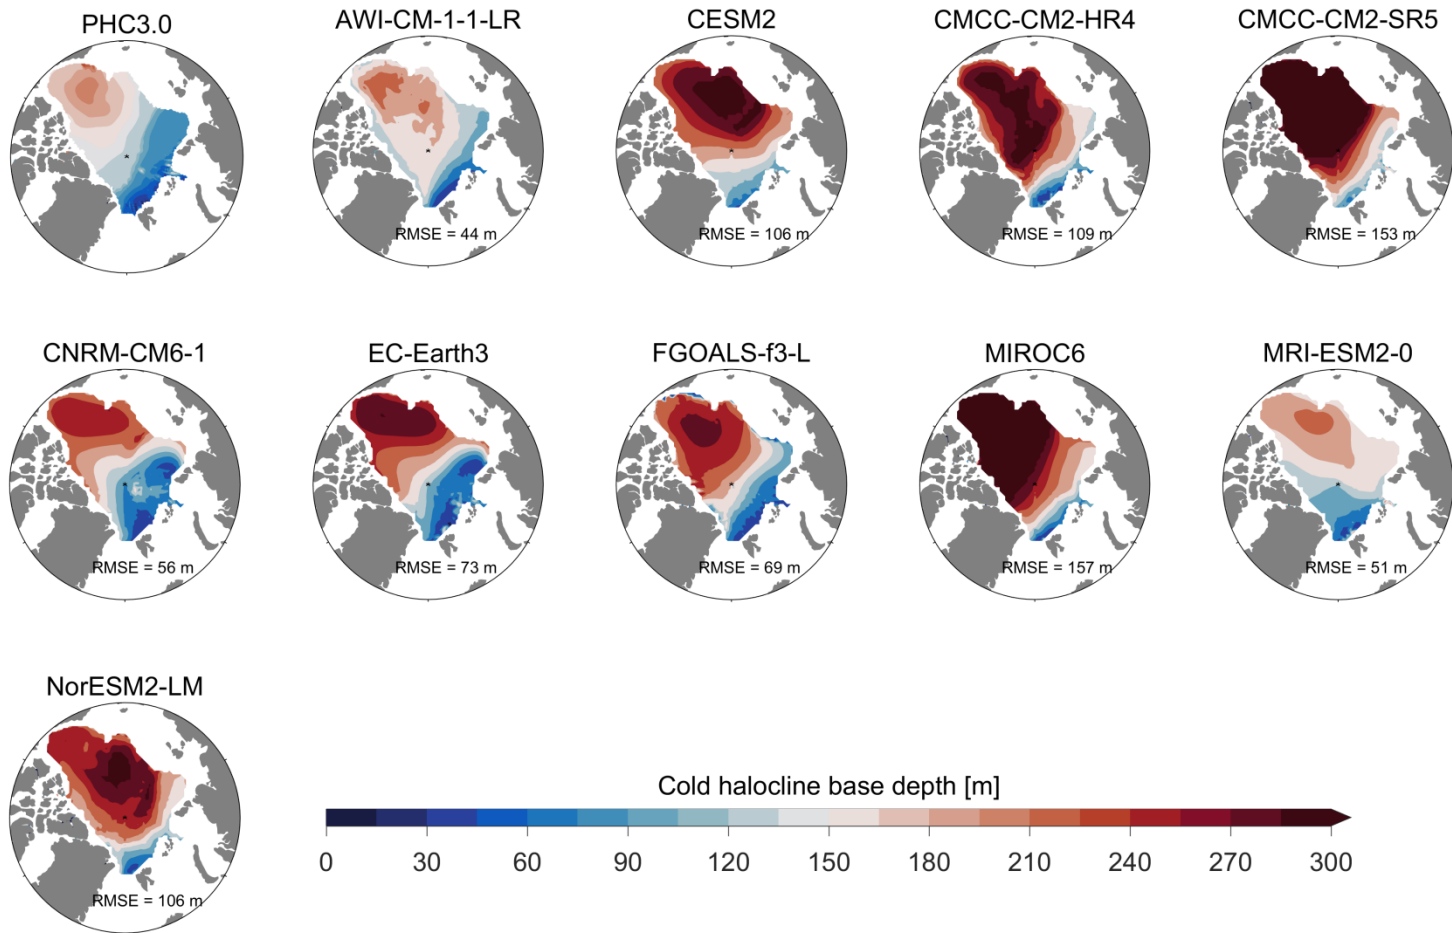

**Figure S11. Cold halocline base depth (unit: m) from PHC3.0 climatology and OMIP-2 models average over 1971 to 2000. The root-mean-square error (RMSE) averaged over the Arctic Ocean is labeled in each panel.**

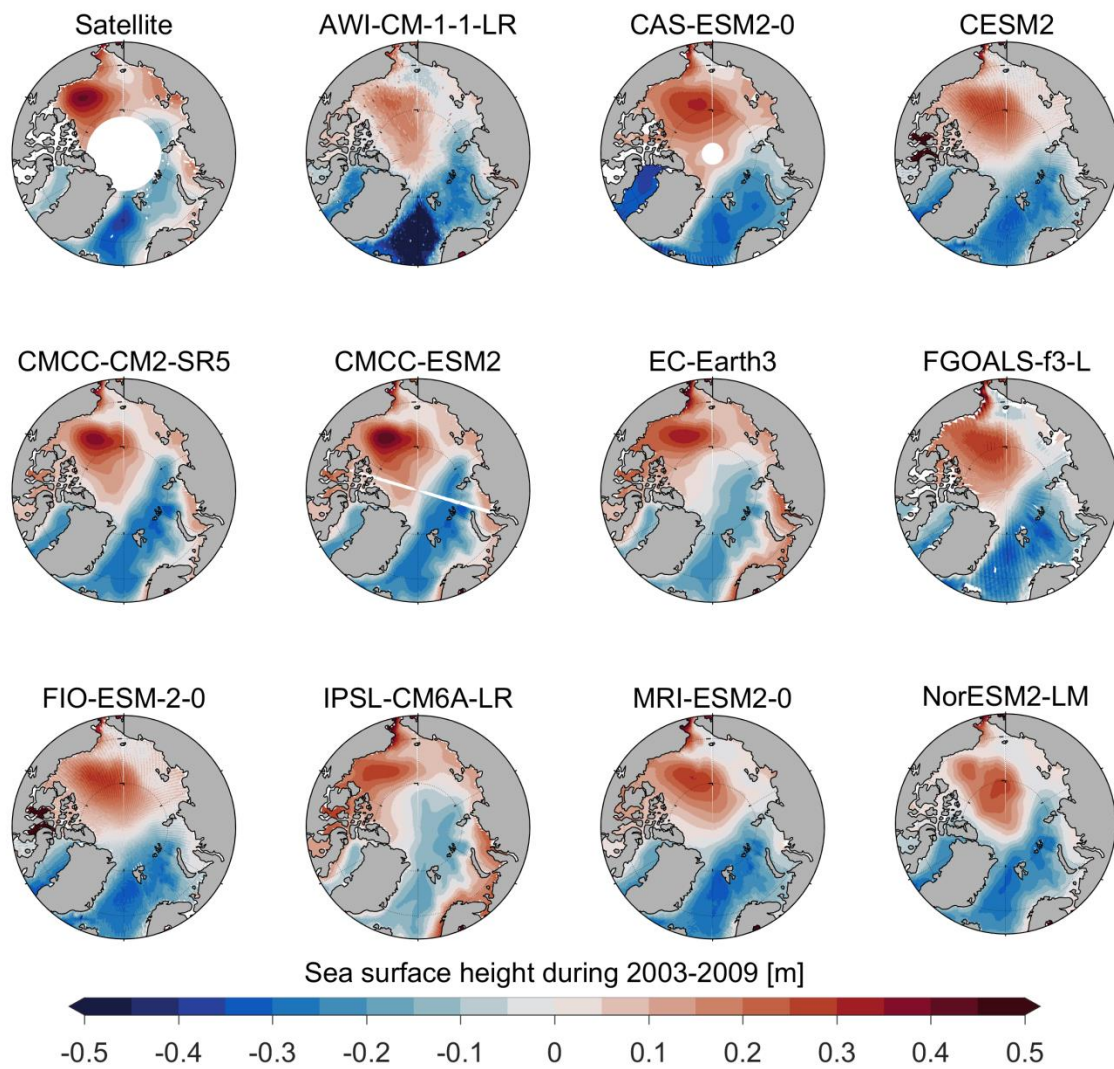

Figure S12. Sea surface height (m) from satellite observation and OMIP-1 simulations during 2003–2009.



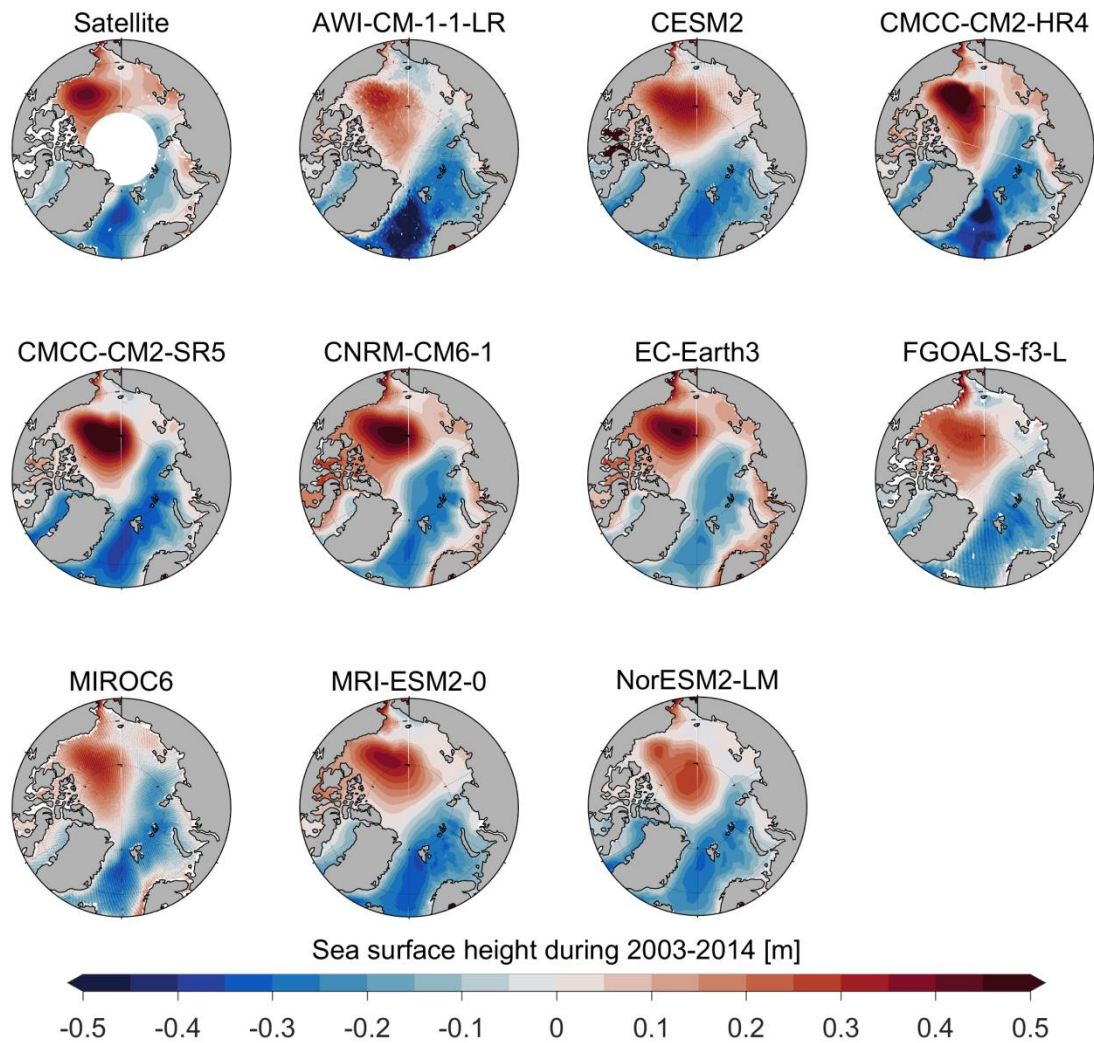

Figure S13. Sea surface height (m) from satellite observation and OMIP-2 simulations during 2003–2014.

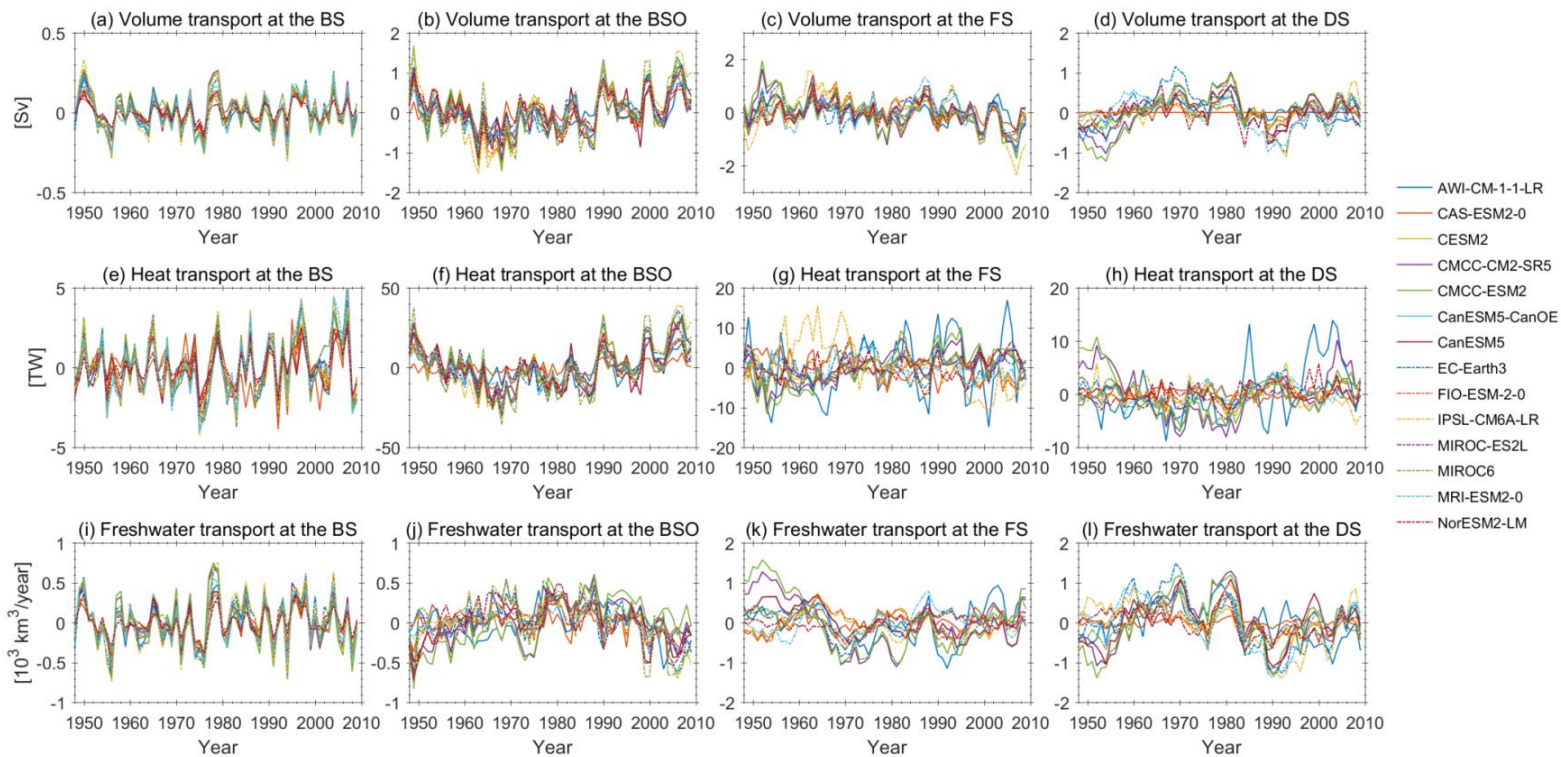

**Figure S14. Ocean volume, heat, and liquid freshwater transport anomalies through the Bering Strait (BS), Barents Sea Opening (BSO), Fram Strait (FS), and Davis Strait (DS) in OMIP-1.**

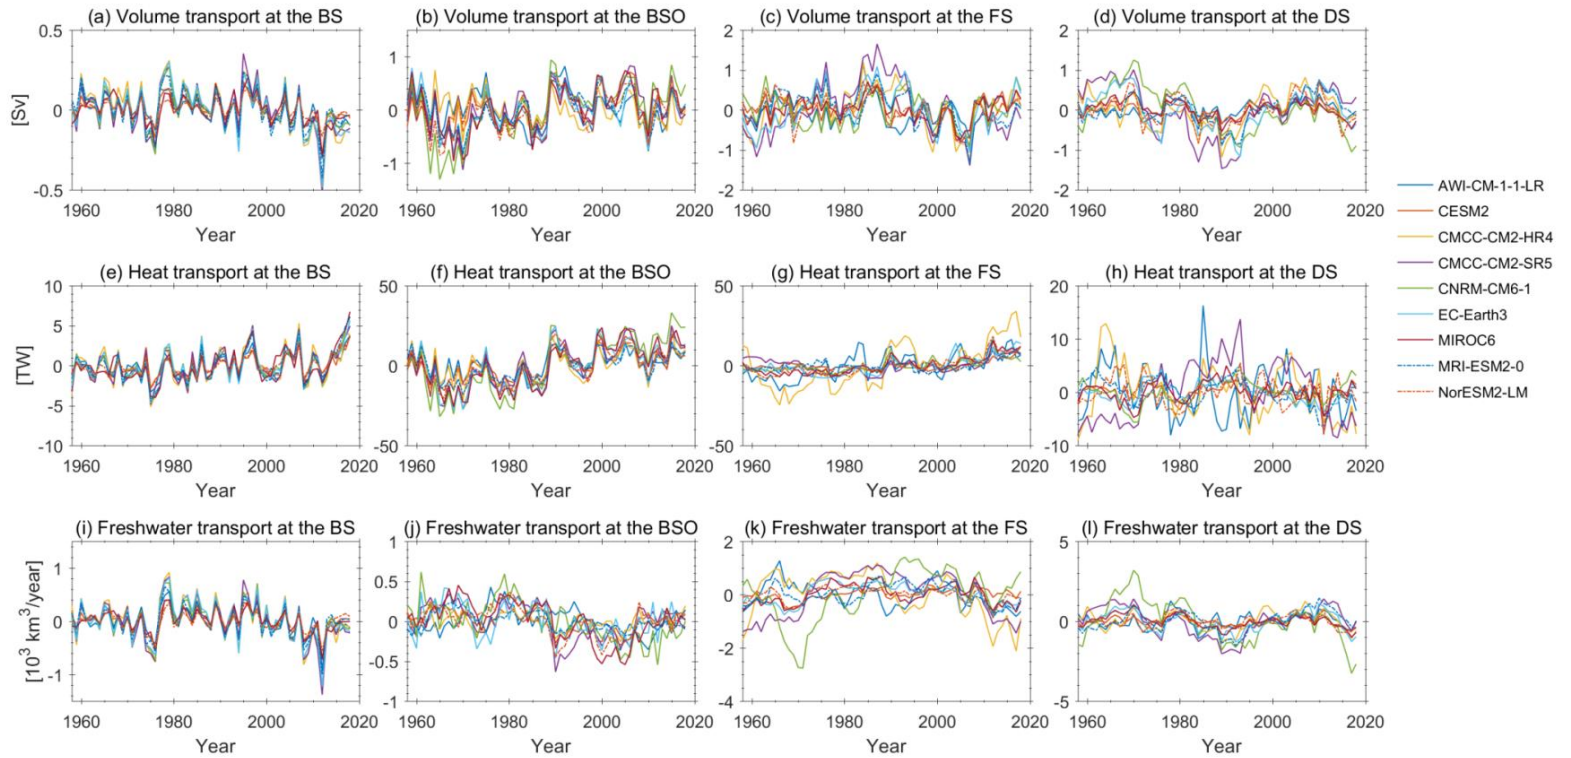

**Figure S15. Ocean volume, heat, and liquid freshwater transport anomalies through the Bering Strait (BS), Barents Sea Opening (BSO), Fram Strait (FS), and Davis Strait (DS) in OMIP-2.**
